# Supplementary material for: Using Carboxymethyl Cellulose as the Additive With Enzyme-Catalyzed Carboxylated Starch to Prepare the Film With Enhanced Mechanical and Hydrophobic Properties
Source: PubMed Central journal article supplement (PMC7884610; doi:10.3389/fbioe.2021.638546), 2021-02-02
Supplement: Image_1.pdf [file Image_1.pdf]

## Supplementary Information

# Using carboxymethyl cellulose as the additive with enzyme-catalyzed carboxylated starch to prepare the film with enhanced mechanical and hydrophobic properties

Can Liu<sup>a</sup>, Shijiao Qin<sup>b</sup>, Jin Xie<sup>a</sup>, Xu Lin<sup>a</sup>, Yunwu Zheng<sup>a</sup>, Jing Yang, Huan Kan<sup>b\*</sup> and Zhengjun Shi<sup>a\*</sup>

*a* The Key Laboratory of State Forestry and Grassland Administration on Highly-Efficient Utilization of Forestry Biomass Resources in Southwest China, Southwest Forestry University, Kunming 650224, PR China

*b* College of Life Science, Southwest Forestry University, Kunming, 650224, PR China

### Supporting Figures

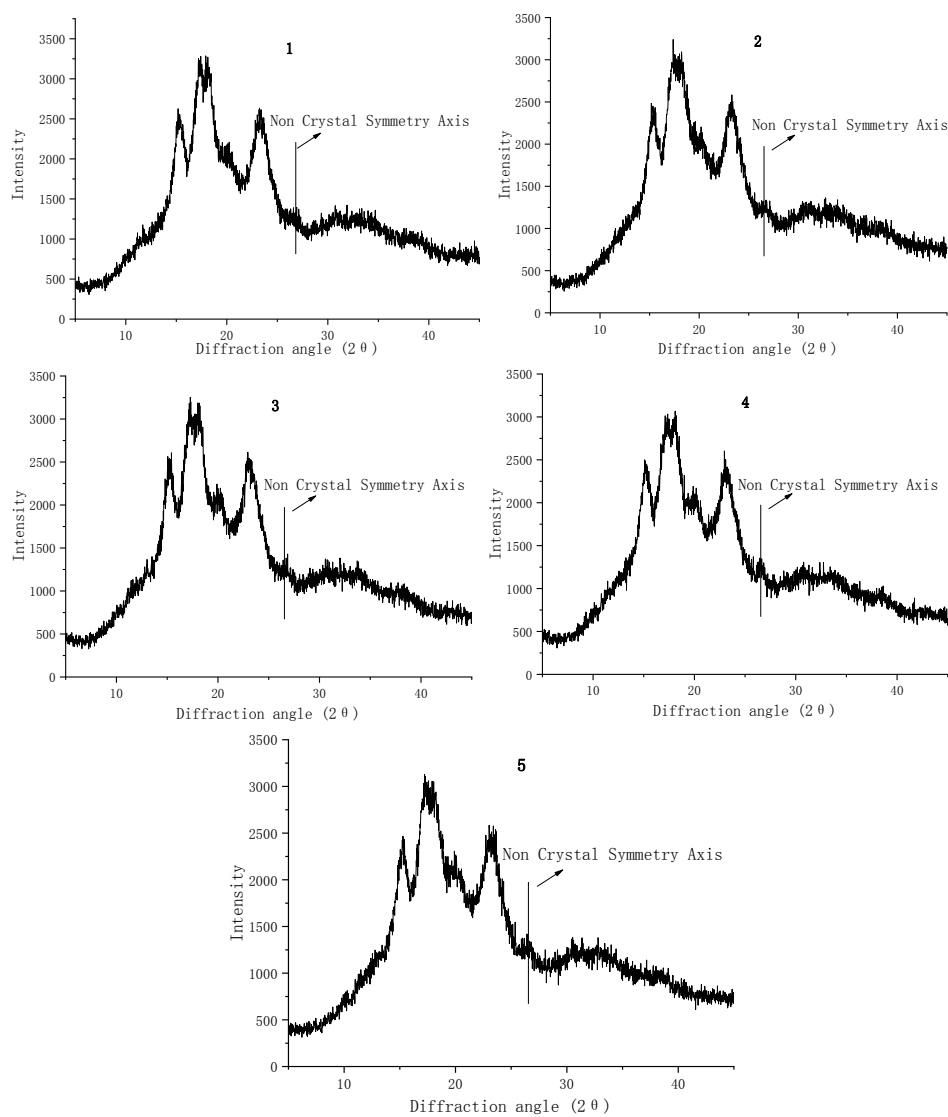

**Figure S1** X-ray diffraction pattern of starch
